# Supplementary material for: Comparative Genomic Analysis Provides Insights into the Phylogeny, Resistome, Virulome, and Host Adaptation in the Genus Ewingella
Source: MDPI journal article supplement (doi:10.3390/pathogens9050330), 2020-04-28
Supplement: s1 [file s1]

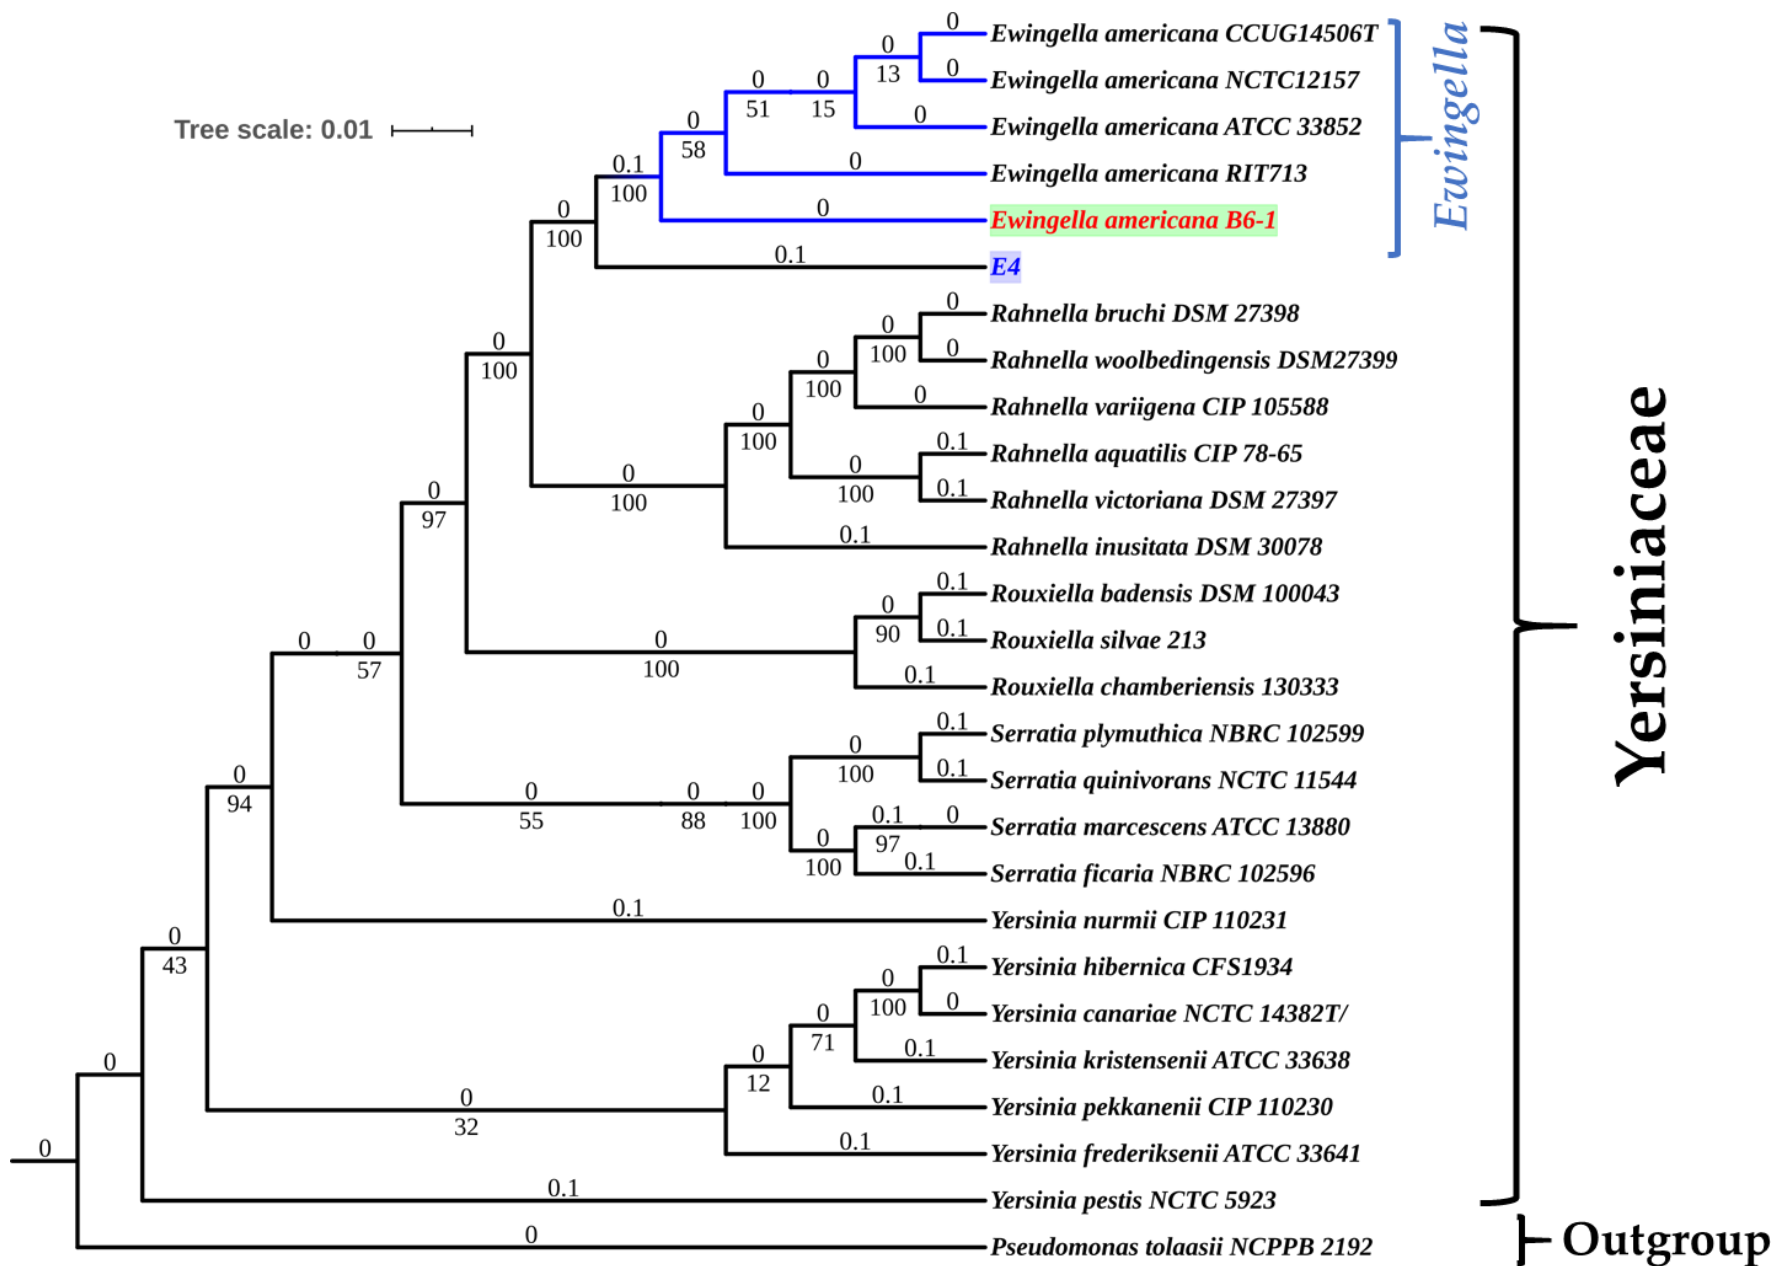

**Figure S3.** Phylogenetic analysis of the five strains of *Ewingella americana* and other closely related neighbors in the family Yersiniaceae. *Pseudomonas tolaasii* was used as an outgroup. Scale bar indicates the average number of nucleotides per substitution.
