# Supplementary material for: Comparative Genomic Analysis Provides Insights into the Phylogeny, Resistome, Virulome, and Host Adaptation in the Genus Ewingella
Source: MDPI journal article supplement (doi:10.3390/pathogens9050330), 2020-04-28
Supplement: s1 [file s1]

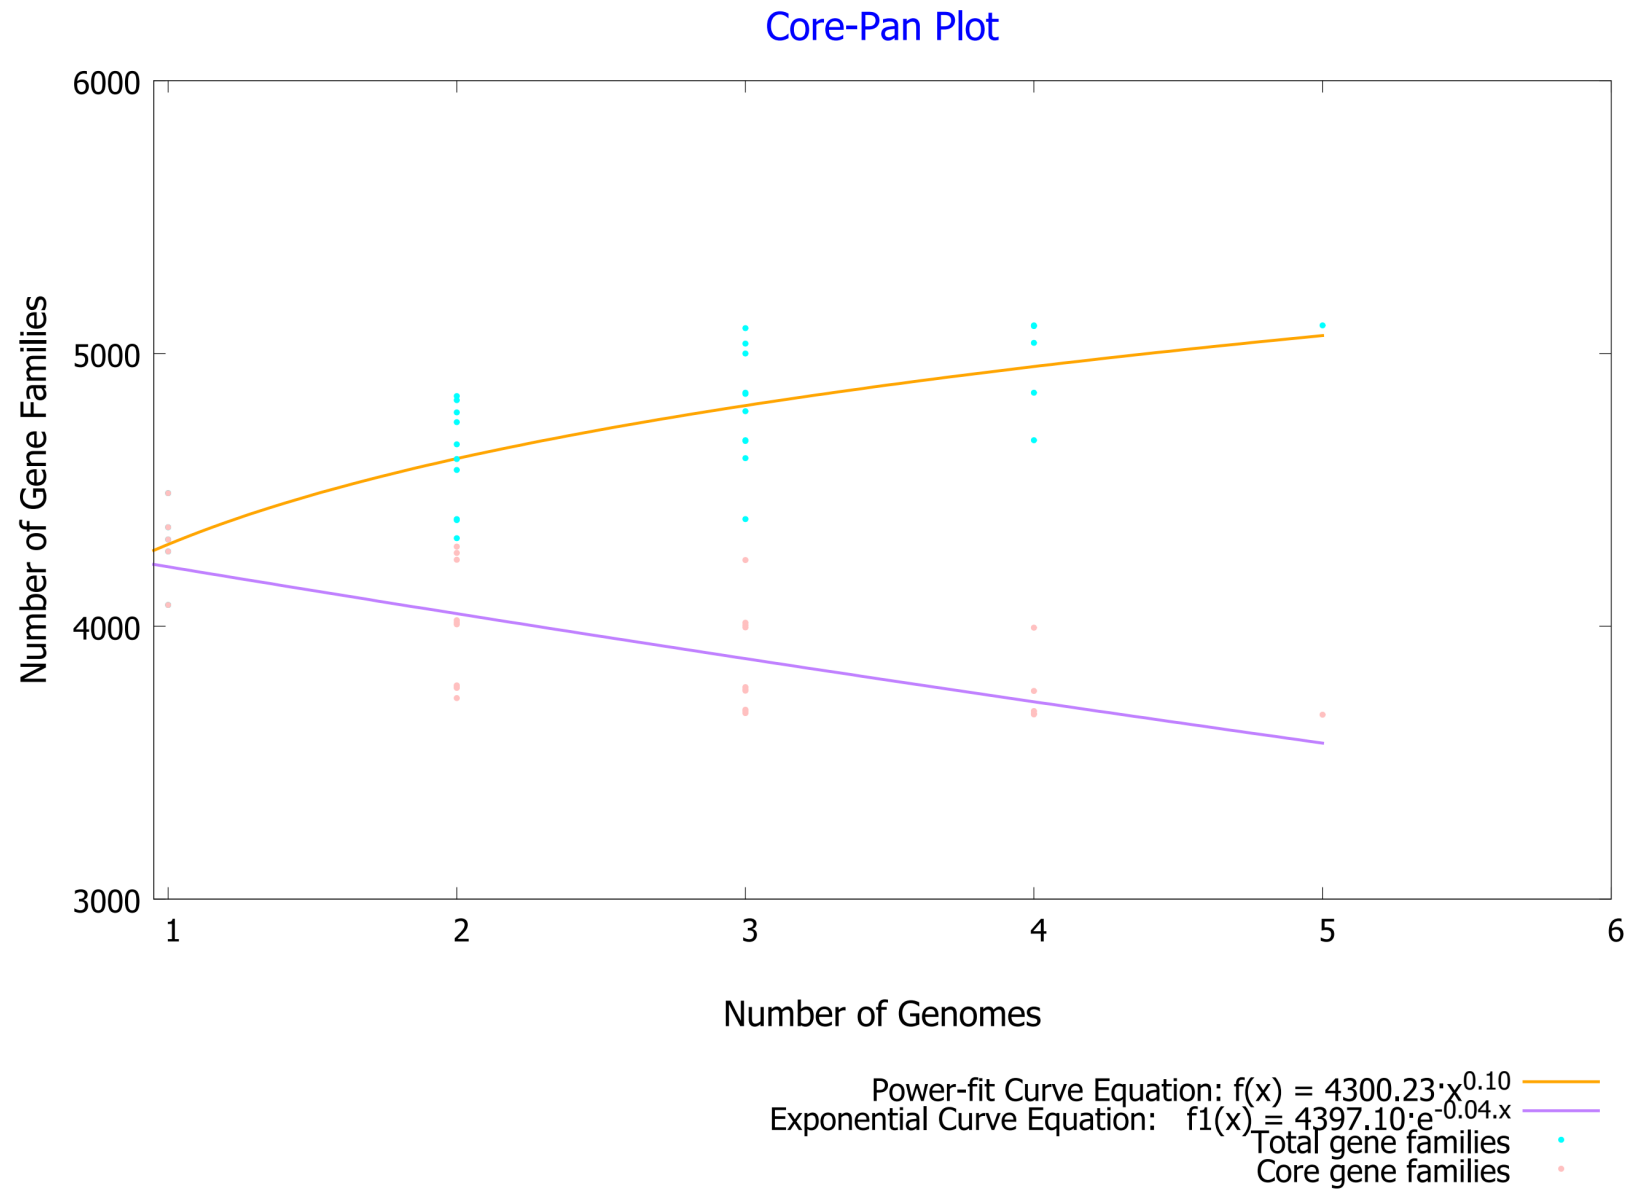

**Figure S2.** The pan-genome analysis of five *Ewingella americana* strains. The number of gene clusters in the pan-genome (orange line) and core-genome (purple line) plotted against the number of *E. americana* genomes
