# Supplementary material for: Comparative Genomic Analysis Provides Insights into the Phylogeny, Resistome, Virulome, and Host Adaptation in the Genus Ewingella
Source: Pathogens. 2020 Apr 28;9(5):330. doi: 10.3390/pathogens9050330 (PMC7281767; doi:10.3390/pathogens9050330)
Supplement: Supplementary file 1 [file pathogens-09-00330-s001.zip]

Archive with 4 entries (4 files):
- FigureS3.pdf
- pathogens-745878.xlsx
- Figure S1.pdf
- Figure S2.pdf
