# Supplementary material for: Comparative Genomic Analysis Provides Insights into the Phylogeny, Resistome, Virulome, and Host Adaptation in the Genus Ewingella
Source: Pathogens. 2020 Apr 28;9(5):330. doi: 10.3390/pathogens9050330 (PMC7281767; doi:10.3390/pathogens9050330)
Supplement: Supplementary file 1 [file pathogens-09-00330-s001.zip › pathogens-745878.xlsx]

## Sheet: Table S1
Table S1: Physiological and biochemical characteristics of Bacterium causing brown rot disease of Flammulina filiformis
Test
	B6-1
Gram reaction	-
Fluorescence	-
oxidase	-
Catalase enzyme	+
Lecithinase（egg yolk）	-
Potato rot	-
Ornithine decarboxylase	-
H2S production	-
Lysine decarboxylase	-
Gelatine liquefaction	-
Starch hydrolysis	-
Arginine dihydrolase	-
Nitrate reduction	+
Indole	-
Growth at 4 ℃	+
Growth at 41 ℃	-
ONPG	+
Potassium cyanide	-
Salicoside	+
Urea	-
D-ribose	+
Galactose	+
Acetate	+
Raffinose	-
Esculin hydrate	+
Mannitol	-
Phenylalanine	+
Arabinose	-
Inositol	-
Sorbose	-
Xylose	-
Malonate	-
Amygdalin	+
Mannose	+
Maltose	-
Gluconate	-
Tartrate	+
Rhamnose	-
Saccharose	-
Cellobiose	+
Fructose	+
Lactose	+
Sorbitol	-
Arabitol	+
Citrate	+
Melibiose	-
NB: ‘+’ means present and ‘-‘ means absent

## Sheet: Table S2
Table S2: List of Bacterial species used for 16S rRNA gene phylogenetic tree
Species	Accession number or strain number	Host
Ewingella americana	MK852339	-
Ewingella americana	MK460249	Anoectochilus roxburghii
Ewingella americana	MN309638	Betula
Ewingella americana	MK414982	-
Ewingella americana	CCUG 14506T	Human
Ewingella americana	ATCC 33852	Human
Ewingella americana	RIT713	Mushroom
Ewingella americana	NCTC12157	Human
Ewingella americana	E4	Soil
Ewingella americana	B6-1	Needle mushroom
Rahnella inusitata	NR_146846	-
Rahnella inusitata	KF308406	-
Rahnella variigena	MK026826	-
Yersinia pestis	L37604	-
Yersinia pestis	X75274	-
Yersinia similis	NR_121742	rabbit
Yersinia similis	NR_042485	-
Serratia liquefaciens	NR _122057	-
Serratia liquefaciens	KY614356	-
Pseudomonas tolaasii	MK355670	-

## Sheet: Table S3
Table S3: The List of Bacterial Species Used in Phylogenetic family tree
No.	TYGS ID	Species	Strain	Authority	Other deposits	Base pairs	Percent G+C	No. proteins	Scaffolds(total)	Scaffold N50 (Mbp)	Coverage (fold)	Goldstamp	Bioproject accession	Biosample accession	Assembly accession	IMG OID	BacDive
1	U31093	Ewingella americana	B6-1			4665173	53.8	4301	1	4.67	192x
2	3009	Ewingella americana	ATCC33852	Grimont et al. 1984	LMG 7869; CCUG 14506; DSM 4580; NCTC 12157; JCM 5911; CDC 1468-78; CIP 81.94	4867808	53.9	4398	92	0.15	15.0x	Gp0009482	PRJNA59551	SAMN02743045	GCA_000735345		strain page
3	U31094	Ewingella americana	CCUG14506T			4910581	53.88	4459	19	0.53	190.35x
4	U31096	Ewingella americana	NCTC12157			4941775	53.87	4635	2	4.59	100x
5	U31097	Ewingella americana	RIT713			5046485	53.81	4664	44	0.23	55.64x
6	U31095	E4	E4			5351618	51.71	4755	39	0.41	82x
7	10245	Yersinia nurmii	CIP 110231	Murros-Kontiainen et al. 2011	APN3a-c; LMG 25213; DSM 22296	4143099	48.3	3624				Gp0133263	PRJEB2879	SAMEA1486436	GCA_001112925		strain page
8	10382	Yersinia canariae	NCTC 14382T/	Nguyen et al. 2020		4710154	47.17	4215					PRJNA224116	SAMN12676035	GCF_009831415		species page
9	11044	Pseudomonas tolaasii	NCPPB 2192	Paine 1919	LMG 2342; CFBP 2068; ICMP 12833; CCUG 23369; CCUG 32782; DSM 19342; ATCC 33618; JCM 21583; NBRC 103163; CIP 106735	6792797	60.58	5984				Gp0112886	PRJNA303528	SAMN04488246	GCA_002813445		strain page
10	11555	Yersinia pestis	NCTC 5923	(Lehmann and Neumann 1896) van Loghem 1944	ATCC 19428; CIP 80.26	4777134	47.58	4249					PRJEB6403	SAMEA104281628	GCA_900460465		species page
11	11587	Samsonia erythrinae	DSM 16730	Sutra et al. 2001	CFBP 5236; ICMP 13937	3874920	52.87	3491				Gp0290570	PRJNA500338	SAMN10362892	GCA_004342665	2791354868	strain page
12	16963	Rahnella victoriana	DSM 27397	Brady et al. 2017	LMG 27717; FRB 225	5302055	53.69	4743					PRJNA523783	SAMN10987324	GCA_004330295		strain page
13	19334	Serratia quinivorans	NCTC 11544	(Grimont et al. 1983) Ashelford et al. 2002	4364; LMG 7887; DSM 4597; ATCC 33765; CIP 103237; CIP 81.95	5875301	54.74	5701				Gp0341814	PRJEB6403	SAMEA3282965	GCA_900457075		strain page
14	19376	Rahnella inusitata	DSM 30078	Brady et al. 2017	LMG 2640	4904017	53.17	4343				Gp0374906	PRJNA492211	SAMN10095182	GCA_003602055		strain page
15	19377	Rahnella variigena	CIP 105588	Brady et al. 2017	LMG 27711	5360909	52.07	4823					PRJNA492262	SAMN10095714	GCA_003602185		species page
16	20693	Rahnella woolbedingensis	DSM 27399	Brady et al. 2017	LMG 27719; FRB 227	5449714	52.2	4899				Gp0359165	PRJNA492234	SAMN10095344	GCA_003602095		strain page
17	23383	Rouxiella silvae	213	Le Flèche-Matéos et al. 2017	DSM 103735; CIP 111154	5280031	50.78	4828				Gp0359269	PRJNA224116	SAMN06100418	GCF_002093625		strain page
18	23384	Rouxiella badensis	DSM 100043	Le Flèche-Matéos et al. 2017	323; CIP 111153	4777650	53.25	4304				Gp0359268	PRJNA224116	SAMN06101559	GCF_002093665		strain page
19	15353	Serratia marcescens subsp. sakuensis	KCTC 42172	Ajithkumar et al. 2003	DSM 17174; JCM 11315; CIP 107489; KRED	5058045	59.65	4719					PRJNA484649	SAMN09767465	GCA_003428265		strain page
20	3016	Serratia marcescens	ATCC 13880	Bizio 1823	LMG 2792; CFBP 4226; NRRL B-2544; CCUG 1647; DSM 30121; NCTC 10211; JCM 1239; NBRC 102204; VKM B-1248; CIP 103235; HAMBI 1286	5092451	59.84	4739				Gp0009486	PRJNA59561	SAMN02743269	GCA_000735445		strain page
21	3021	Yersinia frederiksenii	ATCC 33641	Ursing et al. 1981	# 6175; CCUG 11293; DSM 18490; NCTC 11470; CIP 80.29	4885341	46.93	4358				Gp0002216	PRJNA16106	SAMN00005353	GCA_000168015	638341239	strain page
22	3023	Yersinia kristensenii	ATCC 33638	Bercovier et al. 1981	105; CCUG 11294; CCUG 8241; DSM 18543; NCTC 11471; JCM 7576; CIP 80.30	5042394	47.36	4542				Gp0003846	PRJNA29757	SAMN00005357	GCA_000173715	645058790	strain page
23	4006	Serratia ficaria	NBRC 102596	Grimont et al. 1981	4024; LMG 7881; DSM 4569; ATCC 33105; NCTC 12148; JCM 1241; CIP 79.23; ICPB 4050	5261721	59.91	4830				Gp0070998	PRJDB1514	SAMD00046907	GCA_001590885		strain page
24	4047	Serratia plymuthica	NBRC 102599	(Lehmann and Neumann 1896) Breed et al. 1948	LMG 7886; CCUG 14509; DSM 4540; ATCC 183; NCTC 12961; JCM 1244; CIP 103239	5286355	55.96	4829				Gp0023559	PRJDB268	SAMD00046908	GCA_001590925		strain page
25	4331	Rouxiella chamberiensis	130333	Le Flèche-Matéos et al. 2015	DSM 28324; CIP 110714	4647746	54.14	4123				Gp0118229	PRJNA263737	SAMN03106102	GCA_000951135		strain page
26	577	Rahnella aquatilis	CIP 78-65	Izard et al. 1981	133; LMG 2794; CCUG 14185; DSM 4594; ATCC 33071; JCM 1683; HAMBI 1280	5446950	52.1	4866				Gp0000908	PRJNA60227	SAMN02261385	GCA_000241955	2506520038	strain page
27	6708	Rahnella bruchi	DSM 27398	Brady et al. 2017	LMG 27718; FRB 226	5489294	51.89	4957				Gp0374270	PRJNA492215	SAMN10095204	GCA_003614975		strain page
28	7202	Yersinia hibernica	CFS1934	Nguyen et al. 2019	LMG 31076; NCTC 14222	4803435	47.87	4272				Gp0443774	PRJNA491465	SAMN10078524	GCA_004124235		species page
29	9714	Yersinia pekkanenii	CIP 110230	Murros-Kontiainen et al. 2011	LMG 25369; DSM 22769; AYV7.1KOH2; ÅYV7.1KOH2	5090603	47.42	4784				Gp0133858	PRJEB2879	SAMEA1486427	GCA_001244635		strain page

## Sheet: Table S4
Table S4: Genome similarity values for the different species used
Table S4: The ANI and dDDH values for the Ewingella americana strains and other closely related species
Species	ANI [%]	dDDH [%]
Ewingella americana B6-1	96.44	70.1
Ewingella americana ATCC 33852	99.92	97.4
Ewingella americana CCUG 14506T	99.92	98
Ewingella americana NCTC12157‡	100	100
Ewingella americana RIT713	97.57	78.8
E4	81.01	23.6
Serratia sp. Leaf 51¤	78.92	22.2
Yersinia pestis CO92†	73.37	21.3
‡ Reference genome for E. americana
¤ Best hit for E4 in TCS analysis
† Outgroup

## Sheet: Table S5
Table S5: The Tetra Correlation Search (TCS) calculations for E4
Pos.	Species	Strain	Domain	Phylum	Class	Order	Family	Z-Score
1	Serratia sp. Leaf51	Leaf51	Bacteria	Proteobacteria	Gammaproteobacteria	Enterobacterales	Yersiniaceae	0.96266
2	Rahnella inusitata DSM 30078	DSM 30078	Bacteria	Proteobacteria	Gammaproteobacteria	Enterobacterales	Yersiniaceae	0.96217
3	Rahnella inusitata DSM 30078	DSM 30078	Bacteria	Proteobacteria	Gammaproteobacteria	Enterobacterales	Yersiniaceae	0.96197
4	Erwinia billingiae Eb661	Eb661	Bacteria	Proteobacteria	Gammaproteobacteria	Enterobacterales	Erwiniaceae	0.95133
5	Pantoea rodasii ND03	ND03	Bacteria	Proteobacteria	Gammaproteobacteria	Enterobacterales	Erwiniaceae	0.95089
6	Pantoea sp. BL1	BL1	Bacteria	Proteobacteria	Gammaproteobacteria	Enterobacterales	Erwiniaceae	0.9501
7	Enterobacter cancerogenus M004	M004	Bacteria	Proteobacteria	Gammaproteobacteria	Enterobacterales	Enterobacteriaceae	0.94963
8	Pantoea sp. SM3	SM3	Bacteria	Proteobacteria	Gammaproteobacteria	Enterobacterales	Erwiniaceae	0.94909
9	Pantoea rwandensis str. ND04	ND04	Bacteria	Proteobacteria	Gammaproteobacteria	Enterobacterales	Erwiniaceae	0.94858
10	Cedecea neteri (GCA_001506165) ND02	ND02	Bacteria	Proteobacteria	Gammaproteobacteria	Enterobacterales	Enterobacteriaceae	0.94715
11	Pantoea rodasii LMG 26273	LMG 26273	Bacteria	Proteobacteria	Gammaproteobacteria	Enterobacterales	Erwiniaceae	0.94535
12	Pantoea rodasii DSM 26611	DSM 26611	Bacteria	Proteobacteria	Gammaproteobacteria	Enterobacterales	Erwiniaceae	0.94526
13	Rahnella aquatilis HX2	HX2	Bacteria	Proteobacteria	Gammaproteobacteria	Enterobacterales	Yersiniaceae	0.94447
14	Rahnella aquatilis CIP 78.65 = ATCC 33071 CIP 78.65	CIP 78.65	Bacteria	Proteobacteria	Gammaproteobacteria	Enterobacterales	Yersiniaceae	0.94367
15	Rahnella sp. Y9602	Y9602	Bacteria	Proteobacteria	Gammaproteobacteria	Enterobacterales	Yersiniaceae	0.94364
16	Rahnella aquatilis CIP 78.65 = ATCC 33071 (GCA_000735505) ATCC 33071	ATCC 33071	Bacteria	Proteobacteria	Gammaproteobacteria	Enterobacterales	Yersiniaceae	0.94334
17	Pantoea sp. At-9b	At-9b	Bacteria	Proteobacteria	Gammaproteobacteria	Enterobacterales	Erwiniaceae	0.94202
18	Pantoea rwandensis LMG 26275	LMG 26275	Bacteria	Proteobacteria	Gammaproteobacteria	Enterobacterales	Erwiniaceae	0.94175
19	Trabulsiella odontotermitis 01	1	Bacteria	Proteobacteria	Gammaproteobacteria	Enterobacterales	Enterobacteriaceae	0.94124
20	Kluyvera cryocrescens NBRC 102467	NBRC 102467	Bacteria	Proteobacteria	Gammaproteobacteria	Enterobacterales	Enterobacteriaceae	0.94067
21	Lelliottia amnigena NBRC 105700	NBRC 105700	Bacteria	Proteobacteria	Gammaproteobacteria	Enterobacterales	Enterobacteriaceae	0.94008
22	Lelliottia amnigena LMG 2784	LMG 2784	Bacteria	Proteobacteria	Gammaproteobacteria	Enterobacterales	Enterobacteriaceae	0.94007
23	Enterobacter sp. 638	638	Bacteria	Proteobacteria	Gammaproteobacteria	Enterobacterales	Enterobacteriaceae	0.93962
24	Trabulsiella odontotermitis (GCA_001188495) 12	12	Bacteria	Proteobacteria	Gammaproteobacteria	Enterobacterales	Enterobacteriaceae	0.93947
25	Pantoea sp. 3.5.1	3.5.1	Bacteria	Proteobacteria	Gammaproteobacteria	Enterobacterales	Erwiniaceae	0.93858
26	Citrobacter amalonaticus (GCA_000972645) GTA-817-RBA-P2	GTA-817-RBA-P2	Bacteria	Proteobacteria	Gammaproteobacteria	Enterobacterales	Enterobacteriaceae	0.93851
27	Enterobacter sp. GN02600	GN02600	Bacteria	Proteobacteria	Gammaproteobacteria	Enterobacterales	Enterobacteriaceae	0.93845
28	Pantoea brenneri LMG 5343	LMG 5343	Bacteria	Proteobacteria	Gammaproteobacteria	Enterobacterales	Erwiniaceae	0.93845
29	Citrobacter braakii GTA-CB04	GTA-CB04	Bacteria	Proteobacteria	Gammaproteobacteria	Enterobacterales	Enterobacteriaceae	0.93784
30	Citrobacter freundii (GCA_001689745) A47	A47	Bacteria	Proteobacteria	Gammaproteobacteria	Enterobacterales	Enterobacteriaceae	0.93774
31	Enterobacter cloacae (GCA_900077125) e438	e438	Bacteria	Proteobacteria	Gammaproteobacteria	Enterobacterales	Enterobacteriaceae	0.93766
32	Citrobacter sp. KTE32	KTE32	Bacteria	Proteobacteria	Gammaproteobacteria	Enterobacterales	Enterobacteriaceae	0.93743
33	Enterobacter ludwigii EN-119	EN-119	Bacteria	Proteobacteria	Gammaproteobacteria	Enterobacterales	Enterobacteriaceae	0.93707
34	Rahnella victoriana DSM 27397	DSM 27397	Bacteria	Proteobacteria	Gammaproteobacteria	Enterobacterales	Yersiniaceae	0.93705
35	Citrobacter sp. MGH105	MGH105	Bacteria	Proteobacteria	Gammaproteobacteria	Enterobacterales	Enterobacteriaceae	0.93701
36	Enterobacter cloacae str. Hanford	Hanford	Bacteria	Proteobacteria	Gammaproteobacteria	Enterobacterales	Enterobacteriaceae	0.93689
37	Citrobacter youngae CCUG 30791	CCUG 30791	Bacteria	Proteobacteria	Gammaproteobacteria	Enterobacterales	Enterobacteriaceae	0.93673
38	Citrobacter freundii (GCA_001317135) ST63:944526466	ST63:944526466	Bacteria	Proteobacteria	Gammaproteobacteria	Enterobacterales	Enterobacteriaceae	0.93672
39	Kosakonia radicincitans YD4	YD4	Bacteria	Proteobacteria	Gammaproteobacteria	Enterobacterales	Enterobacteriaceae	0.93668
40	Enterobacter ludwigii (GCA_001023245) GN02226	GN02226	Bacteria	Proteobacteria	Gammaproteobacteria	Enterobacterales	Enterobacteriaceae	0.93659
41	Enterobacter cloacae (GCA_001029645) UW5	UW5	Bacteria	Proteobacteria	Gammaproteobacteria	Enterobacterales	Enterobacteriaceae	0.93657
42	Citrobacter freundii (GCA_001317155) 953086287	953086287	Bacteria	Proteobacteria	Gammaproteobacteria	Enterobacterales	Enterobacteriaceae	0.93645
43	Kosakonia oryzae CGMCC 1.7012	CGMCC 1.7012	Bacteria	Proteobacteria	Gammaproteobacteria	Enterobacterales	Enterobacteriaceae	0.93629
44	Citrobacter freundii 4_7_47CFAA	4_7_47CFAA	Bacteria	Proteobacteria	Gammaproteobacteria	Enterobacterales	Enterobacteriaceae	0.93625
45	Erwinia persicina NBRC 102418	NBRC 102418	Bacteria	Proteobacteria	Gammaproteobacteria	Enterobacterales	Erwiniaceae	0.93621
46	Citrobacter sp. KTE151	KTE151	Bacteria	Proteobacteria	Gammaproteobacteria	Enterobacterales	Enterobacteriaceae	0.9362
47	Enterobacter cloacae EcWSU1	EcWSU1	Bacteria	Proteobacteria	Gammaproteobacteria	Enterobacterales	Enterobacteriaceae	0.9362
48	Enterobacter ludwigii (GCA_001631555) GN04920	GN04920	Bacteria	Proteobacteria	Gammaproteobacteria	Enterobacterales	Enterobacteriaceae	0.93614
49	Citrobacter sp. MGH103	MGH103	Bacteria	Proteobacteria	Gammaproteobacteria	Enterobacterales	Enterobacteriaceae	0.93609
50	Citrobacter sp. 30_2	30_2	Bacteria	Proteobacteria	Gammaproteobacteria	Enterobacterales	Enterobacteriaceae	0.93599
51	Citrobacter sp. MGH110	MGH110	Bacteria	Proteobacteria	Gammaproteobacteria	Enterobacterales	Enterobacteriaceae	0.9359
52	Serratia quinivorans NCTC11544	NCTC11544	Bacteria	Proteobacteria	Gammaproteobacteria	Enterobacterales	Yersiniaceae	0.93586
53	Citrobacter freundii GTC 09479	GTC 09479	Bacteria	Proteobacteria	Gammaproteobacteria	Enterobacterales	Enterobacteriaceae	0.93586
54	Citrobacter freundii (GCA_001546285) GED7749C	GED7749C	Bacteria	Proteobacteria	Gammaproteobacteria	Enterobacterales	Enterobacteriaceae	0.93579
55	Citrobacter sp. MGH99	MGH99	Bacteria	Proteobacteria	Gammaproteobacteria	Enterobacterales	Enterobacteriaceae	0.93579
56	Enterobacter sp. BIDMC 26	BIDMC 26	Bacteria	Proteobacteria	Gammaproteobacteria	Enterobacterales	Enterobacteriaceae	0.93563
57	Citrobacter braakii (GCA_000786265) GTA-CB01	GTA-CB01	Bacteria	Proteobacteria	Gammaproteobacteria	Enterobacterales	Enterobacteriaceae	0.93551
58	Citrobacter freundii (GCA_000783995) FDAARGOS_61	FDAARGOS_61	Bacteria	Proteobacteria	Gammaproteobacteria	Enterobacterales	Enterobacteriaceae	0.93545
59	Enterobacter sp. BIDMC 30	BIDMC 30	Bacteria	Proteobacteria	Gammaproteobacteria	Enterobacterales	Enterobacteriaceae	0.93544
60	Pantoea conspicua LMG 24534	LMG 24534	Bacteria	Proteobacteria	Gammaproteobacteria	Enterobacterales	Erwiniaceae	0.93543
61	Citrobacter sp. BIDMC108	BIDMC108	Bacteria	Proteobacteria	Gammaproteobacteria	Enterobacterales	Enterobacteriaceae	0.93529
62	Lelliottia aquatilis 6331-17	6331-17	Bacteria	Proteobacteria	Gammaproteobacteria	Enterobacterales	Enterobacteriaceae	0.93521
63	Citrobacter pasteurii CIP 55.13	CIP 55.13	Bacteria	Proteobacteria	Gammaproteobacteria	Enterobacterales	Enterobacteriaceae	0.93518
64	Citrobacter freundii UCI 32	UCI 32	Bacteria	Proteobacteria	Gammaproteobacteria	Enterobacterales	Enterobacteriaceae	0.93513
65	Enterobacter cloacae subsp. cloacae (GCA_001472135) SMART_313	SMART_313	Bacteria	Proteobacteria	Gammaproteobacteria	Enterobacterales	Enterobacteriaceae	0.93508
66	Enterobacter cloacae subsp. cloacae (GCA_001472895) SMART_886	SMART_886	Bacteria	Proteobacteria	Gammaproteobacteria	Enterobacterales	Enterobacteriaceae	0.935
67	Citrobacter freundii NBRC 12681	NBRC 12681	Bacteria	Proteobacteria	Gammaproteobacteria	Enterobacterales	Enterobacteriaceae	0.935
68	Citrobacter freundii ATCC 8090 = MTCC 1658 (GCA_000734905) ATCC 8090	ATCC 8090	Bacteria	Proteobacteria	Gammaproteobacteria	Enterobacterales	Enterobacteriaceae	0.93491
69	Citrobacter freundii (GCA_000937455) MRSN 11938	MRSN 11938	Bacteria	Proteobacteria	Gammaproteobacteria	Enterobacterales	Enterobacteriaceae	0.93489
70	Rahnella woolbedingensis DSM 27399	DSM 27399	Bacteria	Proteobacteria	Gammaproteobacteria	Enterobacterales	Yersiniaceae	0.93482
71	Citrobacter freundii ATCC 8090 = MTCC 1658	MTCC 1658	Bacteria	Proteobacteria	Gammaproteobacteria	Enterobacterales	Enterobacteriaceae	0.9348
72	Citrobacter freundii RLS1	RLS1	Bacteria	Proteobacteria	Gammaproteobacteria	Enterobacterales	Enterobacteriaceae	0.93477
73	Enterobacter cloacae subsp. cloacae (GCA_001472955) SMART_901	SMART_901	Bacteria	Proteobacteria	Gammaproteobacteria	Enterobacterales	Enterobacteriaceae	0.9345
74	Citrobacter sp. L17	L17	Bacteria	Proteobacteria	Gammaproteobacteria	Enterobacterales	Enterobacteriaceae	0.93446
75	Citrobacter sp. A1	A1	Bacteria	Proteobacteria	Gammaproteobacteria	Enterobacterales	Enterobacteriaceae	0.93442
76	Enterobacter cloacae subsp. cloacae (GCA_001317435) ST436:951358951	ST436:951358951	Bacteria	Proteobacteria	Gammaproteobacteria	Enterobacterales	Enterobacteriaceae	0.93442
77	Citrobacter freundii (GCA_001702455) B38	B38	Bacteria	Proteobacteria	Gammaproteobacteria	Enterobacterales	Enterobacteriaceae	0.9344
78	Citrobacter portucalensis A60	A60	Bacteria	Proteobacteria	Gammaproteobacteria	Enterobacterales	Enterobacteriaceae	0.93437
79	Enterobacter ludwigii (GCA_001022805) GN02730	GN02730	Bacteria	Proteobacteria	Gammaproteobacteria	Enterobacterales	Enterobacteriaceae	0.9343
80	Kosakonia radicincitans DSM 16656	DSM 16656	Bacteria	Proteobacteria	Gammaproteobacteria	Enterobacterales	Enterobacteriaceae	0.9343
81	Rahnella variigena CIP 105588	CIP 105588	Bacteria	Proteobacteria	Gammaproteobacteria	Enterobacterales	Yersiniaceae	0.93429
82	Citrobacter sp. MGH100	MGH100	Bacteria	Proteobacteria	Gammaproteobacteria	Enterobacterales	Enterobacteriaceae	0.93424
83	Pseudocitrobacter faecalis DSM 27453	DSM 27453	Bacteria	Proteobacteria	Gammaproteobacteria	Enterobacterales	Enterobacteriaceae	0.93424
84	Enterobacter cloacae P101	P101	Bacteria	Proteobacteria	Gammaproteobacteria	Enterobacterales	Enterobacteriaceae	0.93424
85	Citrobacter sp. BIDMC107	BIDMC107	Bacteria	Proteobacteria	Gammaproteobacteria	Enterobacterales	Enterobacteriaceae	0.93418
86	Enterobacter cloacae subsp. cloacae (GCA_001473135) SMART_1093	SMART_1093	Bacteria	Proteobacteria	Gammaproteobacteria	Enterobacterales	Enterobacteriaceae	0.93414
87	Enterobacter sp. 50793107	50793107	Bacteria	Proteobacteria	Gammaproteobacteria	Enterobacterales	Enterobacteriaceae	0.9341
88	Rahnella bruchi DSM 27398	DSM 27398	Bacteria	Proteobacteria	Gammaproteobacteria	Enterobacterales	Yersiniaceae	0.93408
89	Citrobacter sp. MGH109	MGH109	Bacteria	Proteobacteria	Gammaproteobacteria	Enterobacterales	Enterobacteriaceae	0.93399
90	Pantoea cypripedii LMG 2657	LMG 2657	Bacteria	Proteobacteria	Gammaproteobacteria	Enterobacterales	Erwiniaceae	0.93397
91	Citrobacter freundii CFNIH1	CFNIH1	Bacteria	Proteobacteria	Gammaproteobacteria	Enterobacterales	Enterobacteriaceae	0.93396
92	Citrobacter freundii MGH 56	MGH 56	Bacteria	Proteobacteria	Gammaproteobacteria	Enterobacterales	Enterobacteriaceae	0.93395
93	Citrobacter freundii str. SA79	SA79	Bacteria	Proteobacteria	Gammaproteobacteria	Enterobacterales	Enterobacteriaceae	0.93395
94	Enterobacter cloacae subsp. cloacae (GCA_001473155) SMART_1094	SMART_1094	Bacteria	Proteobacteria	Gammaproteobacteria	Enterobacterales	Enterobacteriaceae	0.93393
95	Kosakonia radicincitans UMEnt01/12	UMEnt01/12	Bacteria	Proteobacteria	Gammaproteobacteria	Enterobacterales	Enterobacteriaceae	0.93391
96	Enterobacter cloacae subsp. dissolvens GN02534	GN02534	Bacteria	Proteobacteria	Gammaproteobacteria	Enterobacterales	Enterobacteriaceae	0.9339
97	Citrobacter freundii (GCA_000937505) MRSN 12115	MRSN 12115	Bacteria	Proteobacteria	Gammaproteobacteria	Enterobacterales	Enterobacteriaceae	0.93377
98	Enterobacter cloacae subsp. cloacae (GCA_001022695) GN02616	GN02616	Bacteria	Proteobacteria	Gammaproteobacteria	Enterobacterales	Enterobacteriaceae	0.93371
99	Kluyvera intermedia NBRC 102594 = ATCC 33110 NBRC 102594	NBRC 102594	Bacteria	Proteobacteria	Gammaproteobacteria	Enterobacterales	Enterobacteriaceae	0.93365
100	Citrobacter freundii GTC 09629	GTC 09629	Bacteria	Proteobacteria	Gammaproteobacteria	Enterobacterales	Enterobacteriaceae	0.9335

## Sheet: Table S6
Table S6: The number core, accessory, and unique genes in the Ewingella americana pangenome
No.	Strain	No. of core gene cluster	No. of accessory genes	No. of unique genes	No. of exclusively absent genes																			906
1	B6-1	3676	155	247	319																			904
2	ATCC	3676	595	3	5																			88
3	CCUG	3676	642	0	1																			739
4	NCTC	3676	623	64	13
5	RIT713	3676	391	421	87

## Sheet: Table S7
Table S7: The number of putative antibiotic resistant genes for the Ewingella americana strains identified from search against the CARD database
	Model Name	ARO Accession	Protein Accession	DNA Accession	Description	ATCC	B6-1	CCUG	NCTC	RIT713	AMR Gene Family	Drug Class	Resistance Mechanism	Efflux Component	Resistomes
1	acrB	ARO:3000216	AAC73564.1	U00096.3	multidrug efflux pump RND permease AcrB	1	1	1	2	1	resistance-nodulation-cell division (RND) antibiotic efflux pump	tetracycline antibiotic, phenicol antibiotic, glycylcycline, rifamycin antibiotic, cephalosporin, penam, triclosan, fluoroquinolone antibiotic	antibiotic efflux	antibiotic efflux	Escherichia coli, Klebsiella oxytoca, Klebsiella pneumoniae, Salmonella enterica, Shigella dysenteriae, Shigella flexneri, Shigella sonnei				efflux pump complex or subunit conferring antibiotic resistance
2	acrD	ARO:3000491	BAA16344.1	AP009048.1	aminoglycoside/multidrug efflux system	1	1	1	3	1	resistance-nodulation-cell division (RND) antibiotic efflux pump	aminoglycoside antibiotic	antibiotic efflux	efflux pump complex or subunit conferring antibiotic resistance	Escherichia coli, Shigella dysenteriae, Shigella sonnei
3	acrF	ARO:3000502	AAC76298.1	U00096	multidrug efflux pump RND permease AcrF	1	1	1	2	1	resistance-nodulation-cell division (RND) antibiotic efflux pump	aminoglycoside antibiotic	antibiotic efflux	efflux pump complex or subunit conferring antibiotic resistance	Escherichia coli, Shigella dysenteriae, Shigella sonnei
4	adeF	ARO:3000777	CAJ77856.1	CT025801.2	cation/multidrug efflux pump adeF	0	0	0	1	0	resistance-nodulation-cell division (RND) antibiotic efflux pump	penam, fluoroquinolone antibiotic, cephamycin, cephalosporin	antibiotic efflux	efflux pump complex or subunit conferring antibiotic resistance	Escherichia coli, Shigella sonnei
5	adeJ	ARO:3000781	AAX14802.1	AY769962	AdeJ	0	0	0	1	0	resistance-nodulation-cell division (RND) antibiotic efflux pump	diaminopyrimidine antibiotic, phenicol antibiotic, tetracycline antibiotic, rifamycin antibiotic, carbapenem, penem, fluoroquinolone antibiotic, macrolide antibiotic, cephalosporin, lincosamide antibiotic	antibiotic efflux	efflux pump complex or subunit conferring antibiotic resistance
6	bacA	ARO:3002986	AAC76093.1	U00096.3	undecaprenyl pyrophosphate phosphatase	1	1	1	1	1	undecaprenyl pyrophosphate related proteins	peptide antibiotic	antibiotic target alteration	Escherichia coli, Shigella dysenteriae, Shigella flexneri, Shigella sonnei
7	cpxA	ARO:3000830	BAB38260.1	BA000007.3	two-component system sensor histidine kinase CpxA	1	1	1	1	1	resistance-nodulation-cell division (RND) antibiotic efflux pump	aminocoumarin antibiotic, aminoglycoside antibiotic	antibiotic efflux	efflux pump complex or subunit conferring antibiotic resistance	protein(s) and two-component regulatory system modulating antibiotic efflux	Escherichia coli, Klebsiella oxytoca, Salmonella enterica, Shigella dysenteriae, Shigella flexneri, Shigella sonnei
8	CRP	ARO:3000518	BAE77933.1	AP009048.1	DNA-binding transcriptional dual regulator	1	1	1	1	1	resistance-nodulation-cell division (RND) antibiotic efflux pump	penam, macrolide antibiotic, fluoroquinolone antibiotic	antibiotic efflux	efflux pump complex or subunit conferring antibiotic resistance	protein(s) and two-component regulatory system modulating antibiotic efflux	Escherichia coli
9	emrB	ARO:3000074	AAC75733.1	U00096	multidrug efflux pump membrane subunit EmrB	1	1	1	1	1	major facilitator superfamily (MFS) antibiotic efflux pump	fluoroquinolone antibiotic	antibiotic efflux	efflux pump complex or subunit conferring antibiotic resistance	Escherichia coli, Salmonella enterica, Shigella dysenteriae, Shigella flexneri, Shigella sonnei
10	emrR	ARO:3000516	AAC75731.1	U00096.3	DNA-binding transcriptional repressor MprA	1	1	1	1	1	major facilitator superfamily (MFS) antibiotic efflux pump	fluoroquinolone antibiotic	antibiotic efflux	efflux pump complex or subunit conferring antibiotic resistance	protein(s) and two-component regulatory system modulating antibiotic efflux	Escherichia coli, Salmonella enterica, Shigella dysenteriae, Shigella flexneri, Shigella sonnei
11	Enterobacter cloacae acrA	ARO:3004042	ABG77965.1	DQ679966	multidrug efflux system transporter AcrA	1	1	1	1	1	resistance-nodulation-cell division (RND) antibiotic efflux pump	tetracycline antibiotic, rifamycin antibiotic, phenicol antibiotic, penam, cephalosporin, glycylcycline, triclosan, fluoroquinolone antibiotic	antibiotic efflux	efflux pump complex or subunit conferring antibiotic resistance	Enterobacter cloacae
12	Escherichia coli acrA	ARO:3004043	AAC73565.1	U00096.3	multidrug efflux pump membrane fusion lipoprotein AcrA	1	1	1	1	1	resistance-nodulation-cell division (RND) antibiotic efflux pump	tetracycline antibiotic, rifamycin antibiotic, phenicol antibiotic, penam, glycylcycline, cephalosporin, triclosan, fluoroquinolone antibiotic	antibiotic efflux	efflux pump complex or subunit conferring antibiotic resistance	Escherichia coli, Klebsiella pneumoniae, Salmonella enterica, Shigella dysenteriae, Shigella flexneri, Shigella sonnei
13	Escherichia coli mdfA	ARO:3001328	AFH35853.1	JQ394987	multidrug efflux system translocase MdfA	0	0	0	1	0	major facilitator superfamily (MFS) antibiotic efflux pump	tetracycline antibiotic, benzalkonium chloride, rhodamine	antibiotic efflux	efflux pump complex or subunit conferring antibiotic resistance
14	H-NS	ARO:3000676	BAB35162.1	BA000007.3	global DNA-binding transcriptional dual regulator H-NS	1	1	1	1	1	resistance-nodulation-cell division (RND) antibiotic efflux pump, major facilitator superfamily (MFS) antibiotic efflux pump	penam, macrolide antibiotic, fluoroquinolone antibiotic, cephalosporin, cephamycin, tetracycline antibiotic	antibiotic efflux	efflux pump complex or subunit conferring antibiotic resistance	protein(s) and two-component regulatory system modulating antibiotic efflux	Escherichia coli, Klebsiella oxytoca, Salmonella enterica, Shigella dysenteriae, Shigella flexneri, Shigella sonnei
15	kdpE	ARO:3003841	AAC73788.1	U00096.3	DNA-binding transcriptional activator KdpE	0	0	0	0	1	kdpDE	aminoglycoside antibiotic	antibiotic efflux	protein(s) and two-component regulatory system modulating antibiotic efflux	Escherichia coli, Klebsiella oxytoca, Shigella flexneri, Shigella sonnei
16	mdtB	ARO:3000793	AAC75136.1	U00096	multidrug efflux pump RND permease subunit MdtB	1	1	1	1	1	resistance-nodulation-cell division (RND) antibiotic efflux pump	aminocoumarin antibiotic	antibiotic efflux	efflux pump complex or subunit conferring antibiotic resistance	Escherichia coli, Shigella dysenteriae, Shigella sonnei
17	mdtC	ARO:3000794	AAC75137.1	U00096	multidrug efflux pump RND permease subunit MdtC	1	2	1	1	1	resistance-nodulation-cell division (RND) antibiotic efflux pump	aminocoumarin antibiotic	antibiotic efflux	efflux pump complex or subunit conferring antibiotic resistance	Escherichia coli, Shigella sonnei
18	mdtG	ARO:3001329	ABV18113.1	CP000800.1	multidrug resistance protein MdtG	1	1	1	1	1	major facilitator superfamily (MFS) antibiotic efflux pump	fosfomycin	antibiotic efflux	efflux pump complex or subunit conferring antibiotic resistance	Escherichia coli, Salmonella enterica, Shigella dysenteriae, Shigella flexneri, Shigella sonnei
19	mdtK	ARO:3001327	AML99881.1	CP014358.1	Multidrug resistance protein MdtK	0	0	0	1	1	multidrug and toxic compound extrusion (MATE) transporter	fluoroquinolone antibiotic	antibiotic efflux	efflux pump complex or subunit conferring antibiotic resistance	Salmonella enterica
20	MexB	ARO:3000378	AAA74437.1	L11616	multidrug resistance protein MexB	0	0	0	1	0	resistance-nodulation-cell division (RND) antibiotic efflux pump	peptide antibiotic, sulfonamide antibiotic, penam, diaminopyrimidine antibiotic, macrolide antibiotic, tetracycline antibiotic, carbapenem, cephalosporin, monobactam, phenicol antibiotic, fluoroquinolone antibiotic, aminocoumarin antibiotic, cephamycin, penem	antibiotic efflux	efflux pump complex or subunit conferring antibiotic resistance
21	MexF	ARO:3000804	AAG05882.1	AE004091.2	Resistance-Nodulation-Cell Division (RND) multidrug efflux transporter MexF	0	0	0	1	0	resistance-nodulation-cell division (RND) antibiotic efflux pump	phenicol antibiotic, diaminopyrimidine antibiotic, fluoroquinolone antibiotic	antibiotic efflux	efflux pump complex or subunit conferring antibiotic resistance	Pseudomonas aeruginosa, Pseudomonas fluorescens
22	msbA	ARO:3003950	AAC74000.1	U00096.3	ATP-binding lipopolysaccharide transport protein	1	1	1	1	1	ATP-binding cassette (ABC) antibiotic efflux pump	nitroimidazole antibiotic	antibiotic efflux	efflux pump complex or subunit conferring antibiotic resistance	Escherichia coli, Klebsiella oxytoca, Salmonella enterica, Shigella dysenteriae, Shigella flexneri, Shigella sonnei
23	oqxB	ARO:3003923	AAP43110.2	EU370913.1	OqxB integral membrane protein (plasmid)	1	0	1	4	1	resistance-nodulation-cell division (RND) antibiotic efflux pump	tetracycline antibiotic, glycylcycline, fluoroquinolone antibiotic, diaminopyrimidine antibiotic, nitrofuran antibiotic	antibiotic efflux	efflux pump complex or subunit conferring antibiotic resistance	Citrobacter freundii, Enterobacter hormaecheip, Escherichia coli, Klebsiella oxytoca, Klebsiella pneumoniae, Salmonella enterica, Shigella flexneri, Shigella sonnei
24	pmrF	ARO:3003578	AAC75314.1	U00096	undecaprenyl-phosphate 4-deoxy-4-formamido-L-arabinose transferase	1	1	1	1	1	pmr phosphoethanolamine transferase	peptide antibiotic	antibiotic target alteration		Escherichia coli, Shigella dysenteriaeg, Shigella flexneri, Shigella sonnei
25	rosA	ARO:3003048	AAC60781.1	U46859.1	Major Facilitator Superfamily; pfam07690	1	1	1	1	1	major facilitator superfamily (MFS) antibiotic efflux pump	peptide antibiotic	antibiotic efflux	efflux pump complex or subunit conferring antibiotic resistance
26	rosB	ARO:3003049	AAC60780.1	U46859	Predicted Kef-type K+ transport protein, K+/H+ antiporter domain	1	1	1	1	1	major facilitator superfamily (MFS) antibiotic efflux pump	peptide antibiotic	antibiotic efflux	efflux pump complex or subunit conferring antibiotic resistance
27	tolC	ARO:3000237	ACN32294.1	FJ768952	multi-drug efflux pump TolC	1	1	1	1	1	resistance-nodulation-cell division (RND) antibiotic efflux pump, major facilitator superfamily (MFS) antibiotic efflux pump, ATP-binding cassette (ABC) antibiotic efflux pump	peptide antibiotic, tetracycline antibiotic, aminocoumarin antibiotic, penem, cephalosporin, penam, cephamycin, carbapenem, aminoglycoside antibiotic, fluoroquinolone antibiotic, macrolide antibiotic, glycylcycline, phenicol antibiotic, rifamycin antibiotic, triclosan	antibiotic efflux	efflux pump complex or subunit conferring antibiotic resistance	Escherichia coli, Klebsiella oxytoca, Salmonella enterica, Shigella dysenteriae, Shigella flexneri, Shigella sonnei
	Total					20	20	20	33	22

## Sheet: Table S8
Table S8. Evaluation standards for antibiotic sensitivity
Antibiotic	Dose (μg)	Resistance	Intermediate	Sensitive
		diameter (mm)	diameter (mm)	diameter (mm)
Ampicillin	10	≦13	14-16	≧17
Aztreonam	30	≦15	16-18	≧19
Cefazolin	30	≦14	15-17	≧18
Cefixime	5	≦15	16-18	≧19
Ceftriaxone	30	≦13	14-20	≧21
Clindamycin	22	≦14	15-20	≧21
Ciprofloxacin	5	≦15	16-20	≧21
Erythrocin	15	≦13	14-22	≧23
Gentamicin	10	≦12	13-14	≧15
Kanamycin	30	≦13	14-17	≧18
Novobiocin	5	≦12	13-16	≧17
Ofloxacin	5	≦12	13-15	≧16
Rifampicin	5	≦16	17-19	≧20
Streptomycin	10	≦11	12-14	≧15
Tetracycline	30	≦14	15-18	≧19
Vancomycin	30	≦14	15-16	≧17

## Sheet: Table S9
Table S9: The number of Class I integron found in the genomes of the Ewingella americana strains
No.	Strain	Class I integron (intI1)					Total
		FR822749*	AB625455*	JN849690*	GU304661*	JN193567*
1	ATCC	1	1	2	0	0	4
2	B6-1	0	1	1	1	1	4
3	CCUG	1	1	2	0	0	4
4	NCTC	1	1	2	0	0	4
5	RIT713	1	1	1	1	1	5
* Accession number
	Accession No.	Organism			Cassette arrays
	FR822749	Corynebacterium diphtheriae			5'CS | dfrA16f | qacH2 | 3'CS | qacED1 | sul1 | orf5
	AB625455	Acinetobacter pittii			5'CS | catB8j-aacA4' | aadA5 | 3'CS
	JN849690	plasmid pRSB115			5'CS | blaGES-5 | aacA4' | aadA6j | 3'CS | qacED1 | sul1delta (truncated)
	GU304661	Acinetobacter baumannii			5'CS | dfrA12 | gcuF | aadA2 | 3'CS
	JN193567	Providencia stuartii			5'CS | dfrA14b | arr-2 | cmlA5 | blaOXA-10 | aadA1 | 3'CS | qacED1 | sul1

## Sheet: Table S10
Table S10: The type of insertion sequences in the genomes of the Ewingella americana strains
No.	Family	Strains
		ATCC	B6-1	CCUG	NCTC	RIT713
1	IS256	IS911		IS911	IS911
2	IS3	IS911, ISKpn34, ISBrsa1, ISPrre1, IS1222, ISLad1, ISEc52, ISRaq1, ISEhe4, ISYen3	IS1351, IS1400, ISEcl10, ISKpn53	IS911, ISKpn34, ISBrsa1, ISPrre1, IS1222, ISLad1, ISEc52, ISRaq1, ISEhe4, ISYen3	IS911, ISKpn34, ISBrsa1, ISPrre1, IS1222, ISLad1, ISEc52, ISRaq1, ISEhe4, ISYen3	IS1230B, ISEal1, IS3, ISEc17, IS1664, ISEc16, IS3F, ISPeat2, IS3H, ISSty2
3	IS5	ISSpr2		ISSpr2	ISSpr2
4	Tn3	ISPa42	ISPa42	ISPa42	ISPa42	ISPa42, ISSba14
	Total	4	2	4	4	2

[truncated: 6 more sheets: Table S11, Table S12, Table S13, Table S14, Table S15 , Table S16]
