# Supplementary figures and images for: Comparative Genomic Analysis Provides Insights into the Phylogeny, Resistome, Virulome, and Host Adaptation in the Genus Ewingella
Source: MDPI journal article supplement (doi:10.3390/pathogens9050330), 2020-04-28

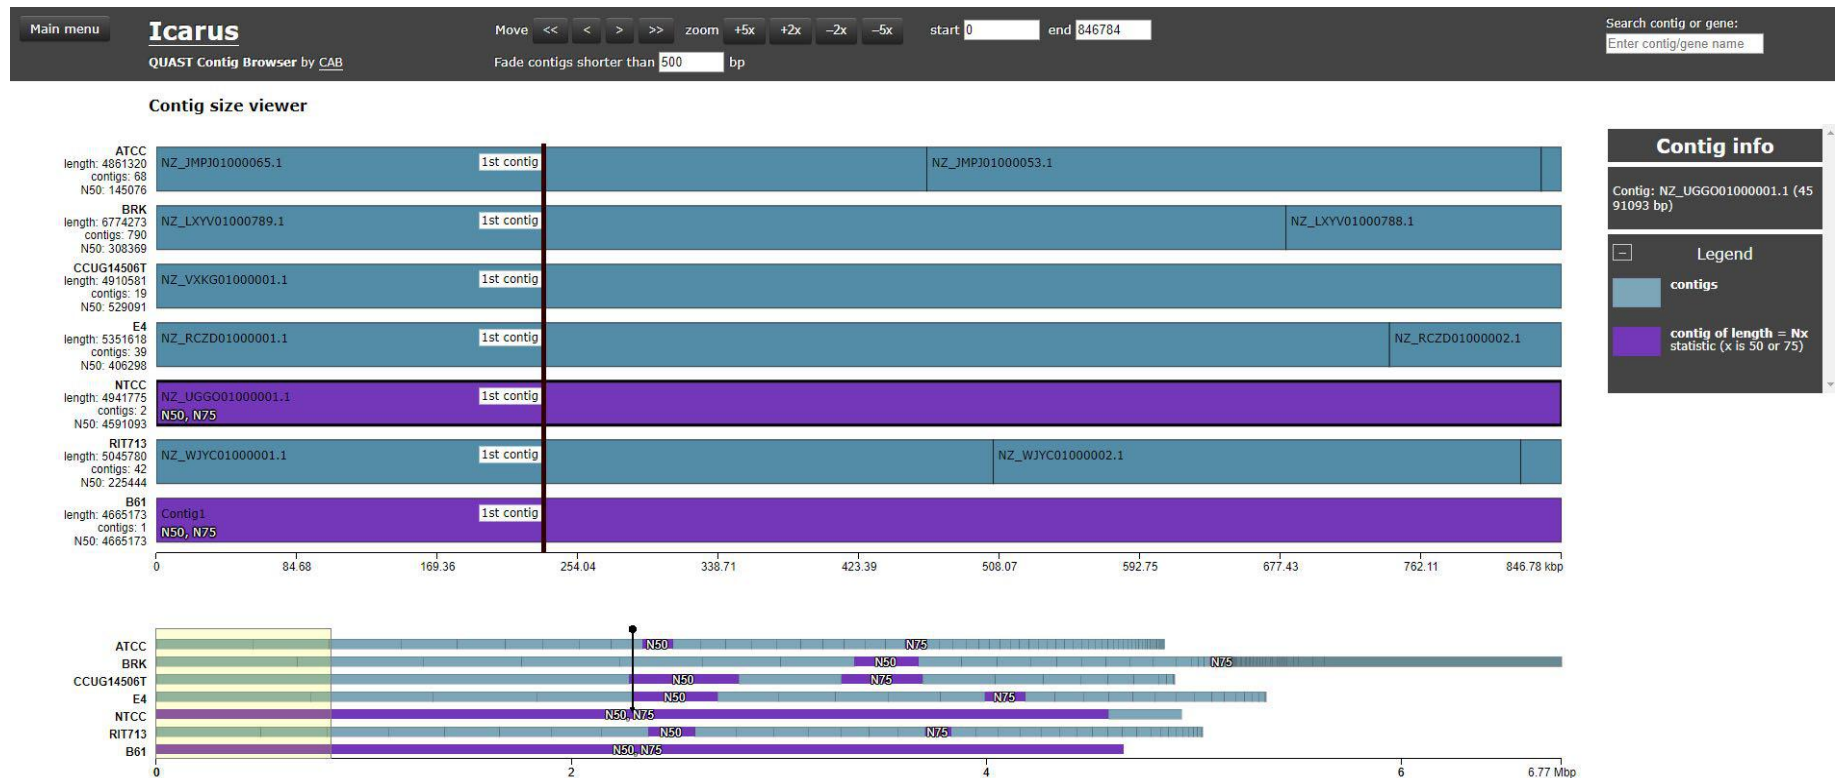

**Figure S1** The quality of the genomes of *Ewingella* sp.

Supplement: s1 [file s1]
